# Supplementary material
Source: MDPI journal article supplement (https://www.mdpi.com/2225-1154/9/5/76)
Supplement: s1 [file s1]

Please tell us about your experience with the training process.

| <b>At the Training (1=not at all, 5=Definitely)</b>                                                                         | <b>Not at all</b> |   |   |   |   | <b>Definitely</b> |   |   |   |   |
|-----------------------------------------------------------------------------------------------------------------------------|-------------------|---|---|---|---|-------------------|---|---|---|---|
| The training purpose and agenda were made clear at the beginning of the in-person training.                                 | 1                 | 2 | 3 | 4 | 5 | 1                 | 2 | 3 | 4 | 5 |
| The venue was a comfortable environment for learning.                                                                       | 1                 | 2 | 3 | 4 | 5 | 1                 | 2 | 3 | 4 | 5 |
| The first activity on climate change impacts and vulnerabilities helped me get to know the other projects and participants. | 1                 | 2 | 3 | 4 | 5 | 1                 | 2 | 3 | 4 | 5 |
| The examples presented prior to each breakout session helped me understand what I needed to accomplish in each step.        | 1                 | 2 | 3 | 4 | 5 | 1                 | 2 | 3 | 4 | 5 |
| I was able to get help from the instructors when I needed it during each breakout session.                                  | 1                 | 2 | 3 | 4 | 5 | 1                 | 2 | 3 | 4 | 5 |
| The whole group discussion following the individual breakouts provided valuable feedback and new insights.                  | 1                 | 2 | 3 | 4 | 5 | 1                 | 2 | 3 | 4 | 5 |
| The presentation on adaptation strategies and approaches helped me understand their usefulness.                             | 1                 | 2 | 3 | 4 | 5 | 1                 | 2 | 3 | 4 | 5 |
| The instructors seemed knowledgeable about climate change impacts in my region.                                             | 1                 | 2 | 3 | 4 | 5 | 1                 | 2 | 3 | 4 | 5 |
| The instructors seemed knowledgeable about climate change adaptation concepts.                                              | 1                 | 2 | 3 | 4 | 5 | 1                 | 2 | 3 | 4 | 5 |
| The instructors were able to explain things using language that I could easily understand.                                  | 1                 | 2 | 3 | 4 | 5 | 1                 | 2 | 3 | 4 | 5 |
| I was able to complete all steps in the workbook by the end of the training session.                                        | 1                 | 2 | 3 | 4 | 5 | 1                 | 2 | 3 | 4 | 5 |

Additional comments:

Please indicate your understanding both before and after the training.

| <b>Level of knowledge (1=low, 5=high)</b>                                                        | <b>Before Training</b> |   |             |   |   | <b>After Training</b> |   |             |   |   |
|--------------------------------------------------------------------------------------------------|------------------------|---|-------------|---|---|-----------------------|---|-------------|---|---|
|                                                                                                  | <b>Low</b>             |   | <b>High</b> |   |   | <b>Low</b>            |   | <b>High</b> |   |   |
| I understand the potential local impacts of climate change on the lands that I manage.           | 1                      | 2 | 3           | 4 | 5 | 1                     | 2 | 3           | 4 | 5 |
| I can explain how climate change may affect my ability to achieve management objectives.         | 1                      | 2 | 3           | 4 | 5 | 1                     | 2 | 3           | 4 | 5 |
| I can identify viable climate change adaptation strategies that can be applied to my local area. | 1                      | 2 | 3           | 4 | 5 | 1                     | 2 | 3           | 4 | 5 |
| I can translate broad adaptation strategies to actionable adaptation tactics in my local area.   | 1                      | 2 | 3           | 4 | 5 | 1                     | 2 | 3           | 4 | 5 |
| I can identify monitoring metrics to assess the effectiveness of my management tactics.          | 1                      | 2 | 3           | 4 | 5 | 1                     | 2 | 3           | 4 | 5 |
| I feel comfortable with my ability to help species and ecosystems adapt to climate change.       | 1                      | 2 | 3           | 4 | 5 | 1                     | 2 | 3           | 4 | 5 |

Additional comments:

Please let us know how you plan to use the knowledge and skills you developed.

| <b>After the Training (1=not at all, 5=Definitely)</b>                                                            | <b>Not at all</b> |   |   | <b>Definitely</b> |   |
|-------------------------------------------------------------------------------------------------------------------|-------------------|---|---|-------------------|---|
| How likely are you to incorporate the plans you developed into on-the-ground actions?                             | 1                 | 2 | 3 | 4                 | 5 |
| How likely are you to implement the monitoring program identified in your plan?                                   | 1                 | 2 | 3 | 4                 | 5 |
| How likely are you to apply the Forest Adaptation Resources workbook process to another project in the next year? | 1                 | 2 | 3 | 4                 | 5 |
| How likely are you to share what you learned at this training with other managers INSIDE your organization?       | 1                 | 2 | 3 | 4                 | 5 |
| How likely are you to share what you learned at this training with other managers OUTSIDE your organization?      | 1                 | 2 | 3 | 4                 | 5 |

Additional comments:

Please help us understand what factors are likely to limit your ability to incorporate climate adaptation practices into your work in the next 5 years.

| <b>Limiting Factors (1=not limiting 5=very limiting)</b> | <b>Not Limiting</b> | <b>Somewhat Limiting</b> |   | <b>Very Limiting</b> |   |
|----------------------------------------------------------|---------------------|--------------------------|---|----------------------|---|
| Resources (such as staff time, funds, equipment)         | 1                   | 2                        | 3 | 4                    | 5 |
| Other work responsibilities of higher priority           | 1                   | 2                        | 3 | 4                    | 5 |
| Guidance or know-how on adaptation                       | 1                   | 2                        | 3 | 4                    | 5 |
| Public support                                           | 1                   | 2                        | 3 | 4                    | 5 |
| Support within your organization                         | 1                   | 2                        | 3 | 4                    | 5 |
| Support or direction from my supervisor                  | 1                   | 2                        | 3 | 4                    | 5 |
| Other (please specify)                                   | 1                   | 2                        | 3 | 4                    | 5 |

Additional comments:

| <b>Describe yourself</b>      |      |        |                          |
|-------------------------------|------|--------|--------------------------|
| Gender                        | Male | Female | Other/ prefer not to say |
| How many years of experience? |      |        |                          |
